# Supplementary material for: Variable stiffness and fast-response soft structures based on electrorheological fluids
Source: Royal Society of Chemistry journal article supplement (doi:10.1039/d3tc01563g), 2023-01-01
Supplement: d3tc01563g3.pdf [file d3tc01563g3.pdf]

## Supporting Information

Huilan Jing<sup>a,b,1</sup>, Letian Hua<sup>a,1</sup>, Fei Long<sup>a,c</sup>, Bojin Lv<sup>a,b</sup>, Bing Wang<sup>a,b</sup>, Hewen Zhang<sup>a</sup>, Xunye Fan<sup>a</sup>, Hongru Zheng<sup>a</sup>, Chengyi Chu<sup>a</sup>, Gaojie Xu<sup>a</sup>, Jianjun Guo<sup>a,\*</sup>, Aihua Sun<sup>a,\*</sup>, and Yuchuan Cheng<sup>a,b,\*</sup>

*a. Zhejiang Key Laboratory of Additive Manufacturing Materials, Ningbo Institute of Materials Technology & Engineering, Chinese Academy of Sciences, Ningbo 315201, P. R. China*

*b. Center of Materials Science and Optoelectronics Engineering, University of Chinese Academy of Sciences, Beijing 100049, P. R. China*

*c. Department of Mechanical, Materials and Manufacturing Engineering, University of Nottingham Ningbo China, Ningbo 315100, P. R. China*

*\* Corresponding authors.*

*E-mail addresses: [jjguo@nimte.ac.cn](mailto:jjguo@nimte.ac.cn) (J. Guo), [sunaihua@nimte.ac.cn](mailto:sunaihua@nimte.ac.cn) (A. Sun),  
[yccheng@nimte.ac.cn](mailto:yccheng@nimte.ac.cn) (Y. Cheng).*

<sup>1</sup> *Huilan Jing and Letian Hua contributed equally to this work.*

## **List of Contents**

**Figure S1.** The fabrication process of CTO particles

**Figure S2.** The XRD pattern of CTO particles

**Figure S3.** Optical photograph of the ER fluid with the concentration of 3.5 g/mL

**Figure S4.** Load as a function of bending displacement in the deformation process of 0-6 mm

**Movie S1.** The shape memory function of the structure

**Movie S2.** The motion locking function of the structure

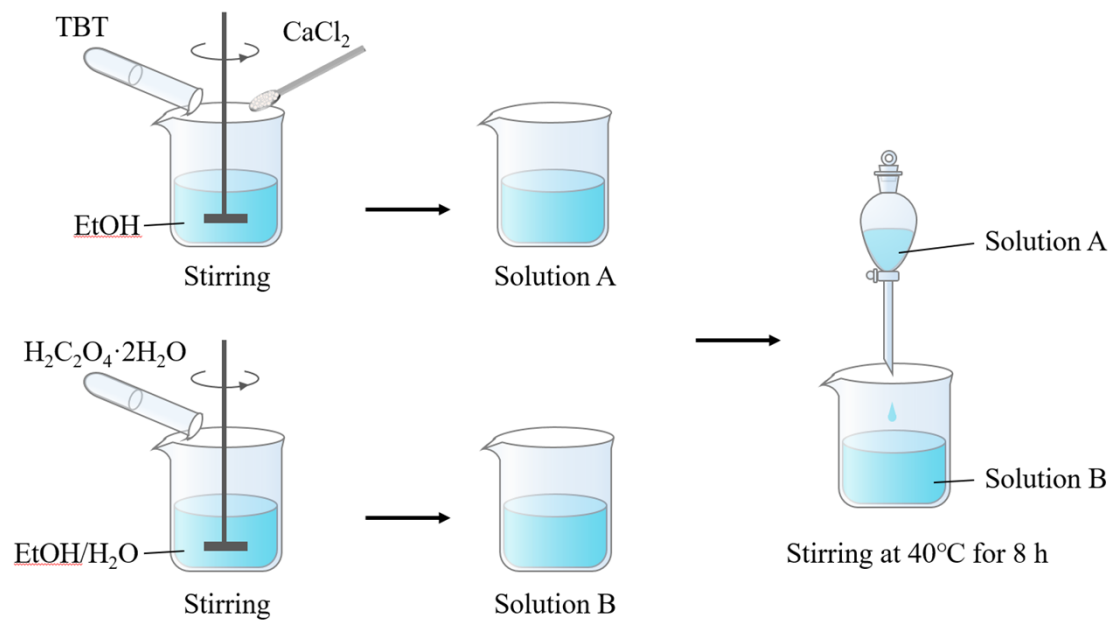

**Fig. S1** The fabrication process of CTO particles

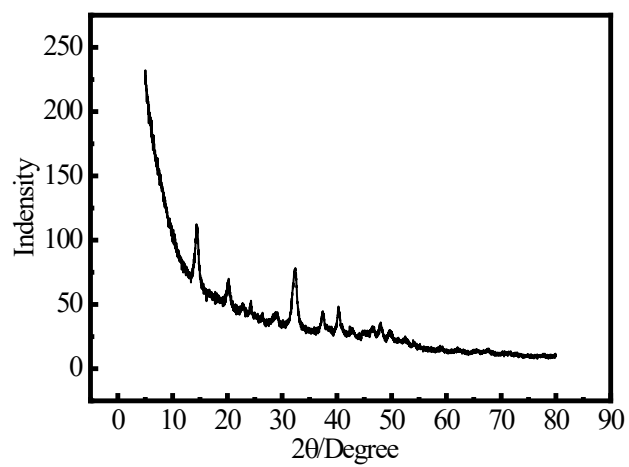

**Fig. S2** The XRD pattern of CTO particles.

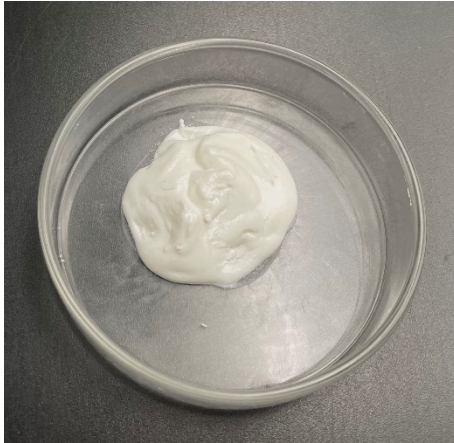

**Fig. S3** Optical photograph of the ER fluid with the concentration of 3.5 g/mL.

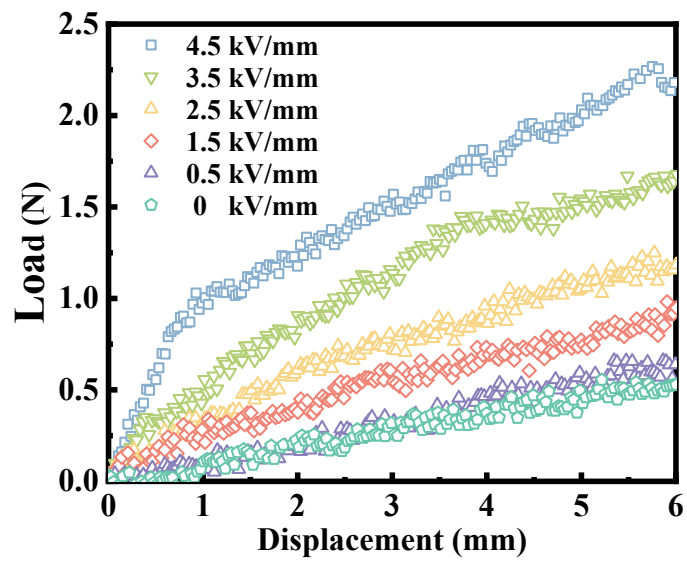

**Fig. S4** Load as a function of bending displacement in the deformation process of 0-6 mm.
